# Supplementary material for: Three-Dimensional Graphene–RGD Peptide Nanoisland Composites That Enhance the Osteogenesis of Human Adipose-Derived Mesenchymal Stem Cells
Source: Int J Mol Sci. 2018 Feb 27;19(3):669. doi: 10.3390/ijms19030669 (PMC5877530; doi:10.3390/ijms19030669)
Supplement: Supplementary file 1 [file ijms-19-00669-s001.pdf]

## Supplementary Information

### TABLE OF CONTENTS

**Figure S1.** The XPS data of ITO/GO/SiNPs/Gold.

**Figure S2.** Raman spectroscopy spectra of each sample.

**Figure S3.** Fluorescence images of hADSCs grown on different substrates.

**Figure S4.** Optical microscopic images of hADSCs with growth medium.

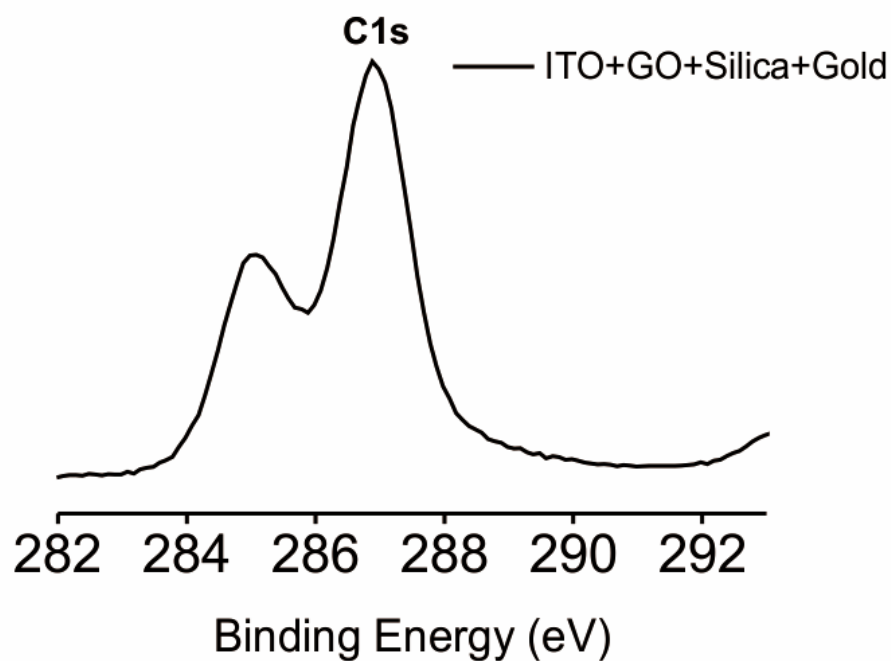

**Figure S1.** The XPS data of ITO/GO/SiNPs/GNPs.

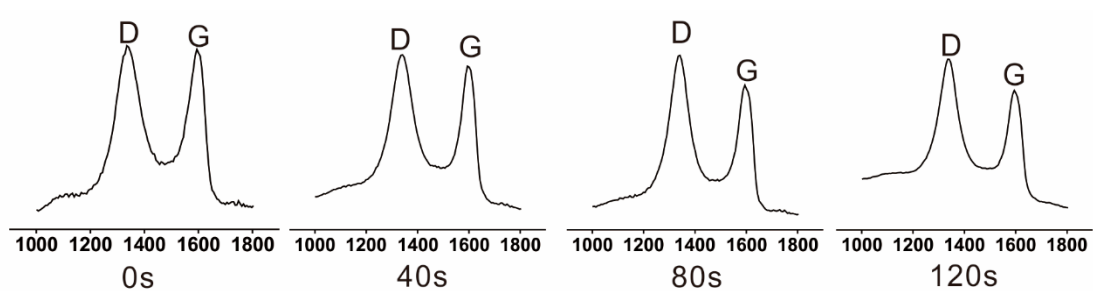

**Figure S2.** Raman spectroscopy spectra of each sample.

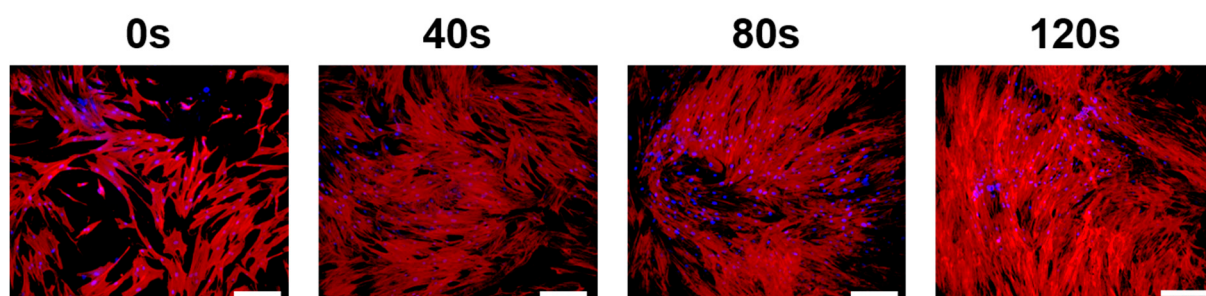

**Figure S3.** Fluorescence images of hADSCs grown on different substrates. F-Actin (red) and nucleus (blue) double-stained fluorescence images of hADSCs that were cultured on four different substrates. Images were used as source for cell growth and spreading analysis (Figure 4). (Scale bars = 200um).

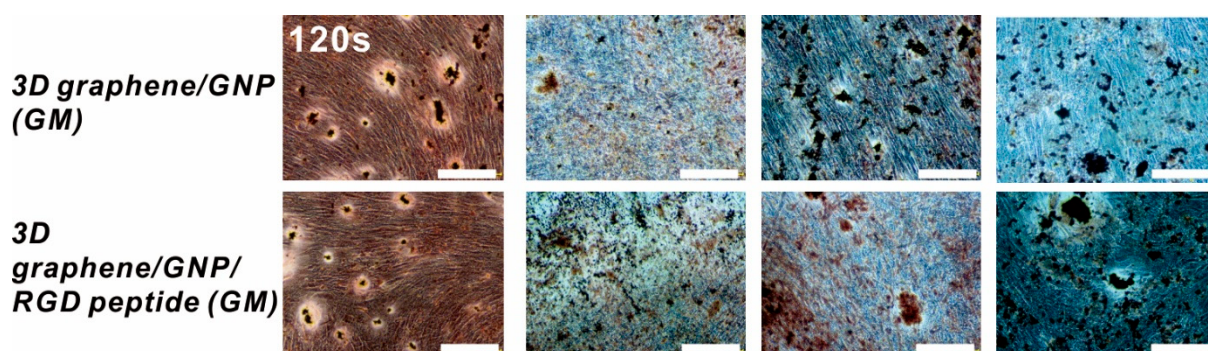

**Figure S4.** Optical microscopic images of hADSCs with growth medium. Confirmation of differentiation of hADSC growth on 3D nanoislands were revealed for 4 weeks. (Scale bar = 200μm).
